# Supplementary material for: A Multidisciplinary Approach to Implement Personalized Breast Cancer Treatment and Care Plans
Source: MDPI journal article supplement (doi:10.3390/curroncol28010075), 2021-02-02
Supplement: s1 [file s1]

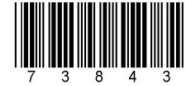

MRN: 12152016  
 Name: Jane Smith  
 Date of Birth: December 14, 1950 (69 years old)  
 Other Medical Conditions: Hypertension, dyslipidemia, type 2 diabetes, and anxiety  
 Current Medications: Valsartan, Metformin, Atorvastatin, Ativan  
 Allergies: None  
 Family History: Second degree relative - Breast cancer  
 Previous Breast Cancer: No

### Surgical Information

#### Dates:

Date of Biopsy: 11th of Aug, 2016  
 Date of Surgery: 1st of Sep, 2016  
 Type of Surgery: Right Breast Mastectomy / Immediate Reconstruction

*Pain, swelling and numbness at the site of surgery and radiation are common and will resolve over time. Follow recommended exercises to improve arm mobility.*

#### Pathology:

Diagnosis: Right Invasive Ductal Carcinoma  
 Size: 1.5 cm  
 Grade: III  
 Margins: negative (closest is 5 mm, anterior),  
 lymphovascular invasion present  
 Sentinel Nodes: 4 nodes negative and 2 nodes positive for malignancy  
 (2/6)  
 Hormone Receptors: ER positive (35%), PR positive (5%), Her2neu positive  
 Stage: IV : (T1N0(i+)M1)

#### Pretreatment

Echocardiogram/MUGA: EF 65%  
 Bone Mineral Density: Normal (6th of Jun, 2018)

Height: 157.00 cm  
 Pretreatment weight: 49.00 kg  
 Pretreatment BSA: 1.46 m<sup>2</sup>  
 Pretreatment BMI: 19.9

#### Staging Tests:

Chest X-ray: *Follow-up required* (15th of Jun, 2016)  
 - Nodule seen in left lung, in accordance with previous  
 COPD.  
 Ultrasound of Abdomen & Pelvis: *Pending* (27th of Apr, 2016)  
 CT of Thorax: *Normal* (8th of Jul, 2016)  
 Bone Scan: *Abnormal* (22nd of Sep, 2016)  
 - Nodule detected in right hip region.

**Venous Access:** Portacath inserted on 22nd of Jul, 2019

### **Oncotype Test**

N/A

### **EndoPredict Test**

EPclin Risk Score: 2.6 (low risk)

10-Year Likelihood of Distant Recurrence: 5% with 5 years of endocrine therapy alone

### **Genetic Screening**

Genetic test has been requested, results pending.

### **Drug Coverage**

Patient has private drug coverage.

### **Psychosocial Support**

Patient requires additional support from social worker

### **Adjuvant Chemotherapy**

You have made the decision with your medical oncologist to undergo chemotherapy to reduce the risk of recurrence and improve survival. Every patient's experience with treatment is different and all measures will be taken to prevent or reduce the side effects.

**Regimen:** AC (Doxorubicin, Cyclophosphamide) (Dose Dense) + Paclitaxel (Biweekly) + Trastuzumab

AC every 2 weeks for 4 cycles, followed by Paclitaxel and Trastuzumab every 2 weeks for 4 cycles, followed by Trastuzumab alone every 3 weeks for 18 cycles.

Treatment dates\*:

|                          |                   |
|--------------------------|-------------------|
| 2nd of Jan, 2019         | 7th of Aug, 2019  |
| 16th of Jan, 2019        | 28th of Aug, 2019 |
| 30th of Jan, 2019        | 18th of Sep, 2019 |
| 13th of Feb, 2019        | 9th of Oct, 2019  |
| 27th of Feb, 2019        | 30th of Oct, 2019 |
| 13th of Mar, 2019        | 20th of Nov, 2019 |
| 27th of Mar, 2019        | 11th of Dec, 2019 |
| <u>10th of Apr, 2019</u> | 1st of Jan, 2020  |
| 24th of Apr, 2019        | 22nd of Jan, 2020 |
| 15th of May, 2019        | 12th of Feb, 2020 |
| 5th of Jun, 2019         | 4th of Mar, 2020  |
| 26th of Jun, 2019        | 25th of Mar, 2020 |
| 17th of Jul, 2019        | 15th of Apr, 2020 |

Your last chemotherapy treatment is on the underlined date, 10th of Apr, 2019. Your Trastuzumab treatment will continue afterwards on the listed dates.

\* Tentative dates; may change according to varying circumstances

### **Possible Early Side Effects of Chemotherapy:**

Allergic reactions

Fatigue  
Fever  
Hair loss  
Joint aches and pains  
Nausea and vomiting  
Neuropathy (tingling and numbness)  
Skin changes  
Sores in the mouth  
Diarrhea.

**Possible Late Side Effects of Chemotherapy:**

Fatigue  
Heart problems  
Joint aches and pains  
Reproductive changes.

Discuss any side effects with your oncology team or consult study website.

**Medications You May Be Given To Prevent Side Effects**

- Ondansetron - To prevent nausea and vomiting.
- Dexamethasone - To reduce nausea and to prevent allergic reaction with docetaxel.
- Aprepitant - To treat nausea.
- Prochlorperazine - To treat nausea.
- Senokot - To prevent and/or treat constipation.
- Nystatin - To treat mouth sores and fungal infection.
- Grastofil - To stimulate the growth of white blood cells, which help your body fight infections.
- Loperamide - To treat diarrhea.
- Tylenol - For pain

**Endocrine or Hormone Therapy (4 weeks after completion of Chemotherapy)**

Endocrine or hormone therapy will be prescribed by the oncologist in addition to chemotherapy for your hormone-receptor-positive breast cancer to further reduce risk of recurrence.

**Regimen:** Tamoxifen

**Possible Common Side Effects:** Hot flashes, vaginal dryness, memory loss, mood changes, fatigue/weakness, mild nausea/vomiting, and dry, itchy skin (rash).

**Possible Less Common Side Effects:** Mild swelling in arms and legs (puffiness), blood clots, unusual vaginal bleeding, and endometrial cancer (rare).

For details of any side effects consult your Oncology team and the study website.

**Radiation Therapy (4 weeks after completion of Chemotherapy)**

A referral has been sent to Princess Margaret Hospital for discussion on your radiation therapy.

Since radiotherapy is localized to a single area (as opposed to chemotherapy, which affects the whole body), skin side effects are mainly found where the radiation is given.

**Possible Side Effects of Radiation:** The affected area may look like a sunburn, being

pink/red, sore, and itching.

#### *Manage skin side effects:*

- Wear loose-fitting clothes so that there is less irritation to the affected area.
- If your doctor has recommended skin salves and ointment, use them as instructed.
- Before your treatment begins, moisturize the skin area that is going to receive radiation.
- Moisturize frequently.

For more information about radiation therapy check [www.UHNPatientEducation.ca](http://www.UHNPatientEducation.ca).

#### **Preparing For Treatment**

- Take medications recommended to reduce and help manage side effects as directed.
- Make a list of questions that you may have for your medical team.
- If possible, bring a family member or friend to the clinic visits.
- Maintain a healthy diet and on days of treatment, eat a light breakfast.
- Bring any medications, *supplements*, minerals, herbal or *alternative medicines* that you are using to the Medical Day Care on the day of your treatment so your medical team can make sure they don't conflict with your chemotherapy treatment.
- Carry out gentle exercises (such as walking, yoga, or tai chi) and/or join exercise groups (such as the Toronto Rehab Breast Rehab Program).
- Ask for a referral to a social worker for support if necessary.

#### **Care Team Information**

Surgeon  
Oncologist  
Radiation Oncologist  
Primary Care Physician  
Care Transfer Facilitator  
Social Worker  
Medical Day Care  
Dietician  
Chaplain

*This treatment plan is provided for your information and education about diagnosis and plan of treatment and management of side effects. Share this with your Primary Care Physician. This treatment plan does not replace the advice of your Oncology Care team. Hope this information for support will help you during your treatment, however your oncology team can be contacted with any further questions or concerns.*

Please visit [breastcancer09.utorontoieit.com/Home.html](http://breastcancer09.utorontoieit.com/Home.html) for further information on side effects, healthy lifestyle, and support services during your diagnosis, treatment and follow-up.

A care plan will be given to you upon completion of your chemotherapy.

The drug information provided with this document was obtained through the Drug Formulary information resource on the Cancer Care Ontario (CCO) website. Please be advised of CCO's disclaimer included with this document.
